# Supplementary material for: Loci Associated with N-Glycosylation of Human Immunoglobulin G Show Pleiotropy with Autoimmune Diseases and Haematological Cancers
Source: PLoS Genet. 2013 Jan 31;9(1):e1003225. doi: 10.1371/journal.pgen.1003225 (PMC3561084; doi:10.1371/journal.pgen.1003225)
Supplement: Table S2 — Descriptive statistics of glycan traits in discovery cohorts. (XLS) [file pgen.1003225.s003.xls]

## Sheet: ST2 - Summary for traits
			CROATIA-Vis				CROATIA-Korcula				ORCADES				NSPHS
GROUP	Edinburgh_Code	Zagreb_Code	Median	IQR	Min	Max	Median	IQR	Min	Max	Median	IQR	Min	Max	Median	IQR	Min	Max
Total IgG glycans (neutral + charged)	IGP1	GP1	0.219	0.17	0.03	0.85	0.1737	0.11	0.03	0.55	0.1733	0.09	0.04	0.49	0.2575	0.15	0.07	0.79
	IGP2	GP2	0.839	0.543	0.11	2.65	0.8248	0.56	0.14	2.7	0.8105	0.5	0.17	2.64	0.9033	0.752	0.14	3.08
	IGP3	GP4	20.93	8.49	6.56	42.37	20.38	8.37	6.48	41.34	20.65	8.08	8.08	42.03	24.81	11.07	10.38	50.27
	IGP4	GP5	0.3238	0.13	0.09	0.74	0.3055	0.13	0.12	0.72	0.2836	0.09	0.13	0.56	0.3518	0.12	0.17	0.79
	IGP5	GP6	5.418	2.12	1.93	11.87	5.588	2.215	2.1	11.09	5.084	2.1	2.23	10.65	5.747	2.79	2.68	11.46
	IGP6	GP7	0.7728	0.505	0.14	2.47	0.7534	0.45	0.15	2.23	0.522	0.3	0.12	1.52	0.6597	0.495	0.13	1.56
	IGP7	GP8	16.35	2.59	9.84	23.7	16.1	2.53	8.93	20.92	18.05	2.22	11.89	25.4	18.49	3.36	11.75	24.14
	IGP8	GP9	7.91	1.572	4.27	11.8	7.991	1.715	4.6	12.1	8.944	1.61	5.01	12.5	8.749	2.15	5.07	13.46
	IGP9	GP10	4.721	1.26	2.48	8.41	4.673	1.21	2.59	8.19	4.578	1.083	2.73	7.7	4.553	1.14	2.91	7.31
	IGP10	GP11	0.7632	0.19	0.33	1.37	0.7844	0.2	0.4	1.47	0.7807	0.19	0.44	1.41	0.6773	0.18	0.36	1.09
	IGP11	GP12	1.061	0.62	0.26	3.08	1.104	0.682	0.23	3.3	0.8924	0.503	0.21	2.71	1.16	0.765	0.21	3.71
	IGP12	GP13	0.2942	0.16	0.08	0.85	0.2281	0.07	0.1	0.46	0.2432	0.07	0.13	0.48	0.2801	0.1125	0.11	0.65
	IGP13	GP14	11.4	5.062	3.39	22.97	11.24	4.82	3.5	21.93	12.51	5.005	3.66	23.91	12.37	6.79	3.34	22.38
	IGP14	GP15	1.445	0.47	0.71	2.64	1.538	0.43	0.68	2.81	1.67	0.445	0.77	2.83	1.517	0.49	0.67	2.75
	IGP15	GP16	3.191	0.662	1.99	5.11	3.235	0.61	1.82	4.74	3.24	0.59	1.69	5.25	2.835	0.648	1.74	4.41
	IGP16	GP17	3.043	1.72	1	8.9	2.798	1.478	0.94	8.24	1.648	0.538	0.92	3.4	1.222	0.515	0.49	2.98
	IGP17	GP18	8.875	3.508	3.96	17.31	9.301	3.5	3.58	19.38	9.595	3.615	3.45	18.92	8.145	4.275	0.94	16.68
	IGP18	GP19	2.494	0.68	1.16	4.51	2.482	0.62	1.21	4.49	2.421	0.47	1.3	4.03	2.032	0.63	0.72	3.5
	IGP19	GP20	0.4991	0.4	0.07	1.87	0.6914	0.48	0.11	2.32	0.5395	0.195	0.25	1.27	0.3334	0.145	0.14	0.81
	IGP20	GP21	3.874	2.296	1.03	11.5	3.96	2.756	0.98	13.44	1.724	0.645	0.86	3.96	0.8328	0.445	0.18	1.71
	IGP21	GP22	0.3995	0.2	0.06	1.04	0.3249	0.13	0.08	0.77	0.3123	0.13	0.06	0.77	0.2377	0.125	0.06	0.62
	IGP22	GP23	2.029	0.79	0.71	4.39	2.324	0.84	0.9	4.67	2.323	0.88	0.88	4.62	1.672	0.945	0.13	3.48
	IGP23	GP24	2.752	0.78	1.02	5.35	2.801	0.772	1.21	5.44	2.659	0.68	0.97	4.35	2.039	0.925	0.52	4.4
Total IgG glycans - derived parameters	IGP24	FGS/(FG+FGS)	28.19	4.4	17.59	39.6	29.48	4.54	20.13	41.69	27.55	4.2	19.63	37.27	23.94	4.86	14.22	34.48
	IGP25	FBGS/(FBG+FBGS)	43.09	8.93	14.07	70.44	43.04	7.87	27.84	60.72	42.09	6.67	26.74	60.55	37.43	10.07	15.25	55.64
	IGP26	FGS/(F+FG+FGS)	19.94	5.87	9.67	33.5	21.07	5.8	9.63	34.79	20.08	5.34	9.14	32.28	16.38	6.56	1.72	27.66
	IGP27	FBGS/(FB+FBG+FBGS)	30.08	8.05	10.16	57.36	29.86	7.61	14.17	48.83	29.95	7.01	10.37	51.19	24.88	8.91	7.69	38.64
	IGP28	FG1S1/(FG1+FG1S1)	11.68	2.58	7.44	20.65	11.9	2.32	7.58	19.63	10.75	2.005	5.99	15.84	9.478	2.142	5.46	15.25
	IGP29	FG2S1/(FG2+FG2S1+FG2S2)	39.8	3.23	32.05	49.45	40.69	3.26	33.77	47.89	39.37	3.25	30.62	48.48	36.65	3.74	27.95	44.23
	IGP30	FG2S2/(FG2+FG2S1+FG2S2)	9.417	3.33	3.61	20.28	10.48	3.368	4.7	21.12	9.735	2.67	4.18	17.49	7.758	3.235	1.64	17.29
	IGP31	FBG2S1/(FBG2+FBG2S1+FBG2S2)	37.23	4.7	26.27	49.34	36.3	4.66	25.86	46.49	35.82	4.06	26.32	44.43	36.4	5.28	28.57	47.56
	IGP32	FBG2S2/(FBG2+FBG2S1+FBG2S2)	40.94	6	23.09	59.58	40.92	5.72	29.18	54.25	39.27	4.48	27.42	50.45	35.54	9.08	18.25	50.17
	IGP33	FtotalS1/FtotalS2	3.125	0.8	1.05	5.62	2.989	0.71	1.31	4.86	3.104	0.678	1.19	5.4	3.741	1.14	1.78	7.44
	IGP34	FS1/FS2	6.23	1.985	1.33	12.22	5.616	1.53	1.83	10.59	5.717	1.512	3.2	9.84	7.159	2.82	3.28	16.49
	IGP35	FBS1/FBS2	0.919	0.18	0.55	1.45	0.8973	0.18	0.6	1.43	0.9211	0.155	0.46	1.39	1.051	0.288	0.69	1.75
	IGP36	FBStotal/FStotal	0.3859	0.125	0.18	0.73	0.3682	0.12	0.14	0.69	0.3474	0.1	0.12	0.65	0.3393	0.16	0.11	0.81
	IGP37	FBS1/FS1	0.2162	0.08	0.09	0.48	0.207	0.08	0.07	0.41	0.1986	0.07	0.08	0.44	0.1986	0.09	0.07	0.5
	IGP38	FBS1/(FS1+FBS1)	0.1761	0.05	0.08	0.34	0.1694	0.05	0.06	0.29	0.1636	0.05	0.07	0.31	0.1621	0.06	0.06	0.33
	IGP39	FBS2/FS2	1.421	0.435	0.56	2.83	1.264	0.41	0.6	2.54	1.208	0.408	0.48	2.55	1.299	0.61	0.48	2.58
	IGP40	FBS2/(FS2+FBS2)	0.579	0.08	0.36	0.75	0.55	0.08	0.37	0.78	0.5388	0.08	0.32	0.78	0.555	0.12	0.32	0.91
Neutral IgG glycans	IGP41	GP1n	0.2997	0.24	0.05	1.15	0.2444	0.16	0.04	0.82	0.2286	0.11	0.06	0.64	0.3121	0.18	0.09	0.97
	IGP42	GP2n	1.151	0.71	0.17	3.39	1.144	0.78	0.21	3.75	1.07	0.63	0.25	3.25	1.109	0.907	0.18	3.84
	IGP43	GP4n	28.57	10.15	11.14	52.74	28.14	9.44	10.54	50.78	27.21	9.28	11.41	56.6	30.42	11.75	14.14	57.01
	IGP44	GP5n	0.4535	0.19	0.11	1.14	0.4289	0.2	0.16	1.04	0.3782	0.11	0.17	0.76	0.4312	0.15	0.2	0.98
	IGP45	GP6n	7.415	2.605	3.07	16.01	7.725	2.52	3.1	13.51	6.684	2.56	3.09	13.19	7.061	3.245	3.6	13.39
	IGP46	GP7n	1.054	0.65	0.2	3.3	1.056	0.64	0.21	3.13	0.6989	0.42	0.16	2.05	0.8243	0.59	0.15	2.16
	IGP47	GP8n	22.6	3.49	12.24	31.73	22.48	3.36	14.74	28.99	24.01	3.3	13.97	33.33	23.04	4.9	13.5	28.99
	IGP48	GP9n	10.92	2.022	5.32	15.53	11.14	2.355	7.03	16.02	11.88	1.87	6.02	16.37	10.87	2.6	6.05	16.69
	IGP49	GP10n	6.514	1.605	3.75	11.12	6.514	1.545	3.78	11.08	6.074	1.372	3.41	9.83	5.657	1.365	3.34	8.81
	IGP50	GP11n	1.057	0.28	0.52	2.01	1.094	0.27	0.56	2.05	1.035	0.24	0.57	1.72	0.8405	0.23	0.45	1.4
	IGP51	GP12n	1.48	0.892	0.37	4.58	1.57	1.03	0.31	4.95	1.182	0.72	0.25	3.14	1.444	0.955	0.25	4.26
	IGP52	GP13n	0.4028	0.21	0.11	1.14	0.322	0.11	0.13	0.7	0.3254	0.09	0.15	0.64	0.351	0.14	0.13	0.8
	IGP53	GP14n	15.91	7.63	4.22	37.89	15.83	7.12	4.64	35.47	16.81	7.54	4.18	34.38	15.6	9.44	3.78	31.72
	IGP54	GP15n	2.011	0.72	0.88	3.95	2.167	0.745	0.91	4.56	2.236	0.655	0.88	3.99	1.904	0.66	0.77	3.58
Neutral IgG glycans - derived parameters	IGP55	G0n	37.5	12.52	14.69	69.57	37.31	11.63	15.43	62.82	35.27	11.38	16.17	69.42	38.97	14.54	21.12	69.12
	IGP56	G1n	42.21	4.48	26.85	50.96	42.33	4.41	29.59	49.26	43.8	3.5	31.8	50.23	41.33	4.6	25.81	48.72
	IGP57	G2n	19.85	8.77	5.93	43.76	19.92	8.12	7.05	43.52	20.6	8.4	5.64	40.27	19.33	10.1	5.18	36.83
	IGP58	Fn total	95.38	2.27	87.98	98.64	95.41	2.34	87.33	98.64	96.28	1.81	90.59	98.67	95.76	2.58	90.58	98.86
	IGP59	FG0n total/G0n	96.87	1.91	90.4	99.59	96.86	2.15	89.62	99.52	96.9	1.88	90.64	99.41	97.17	2.02	90.47	99.43
	IGP60	FG1n total/G1n	97.48	1.58	92.31	99.57	97.5	1.54	92.56	99.54	98.4	0.91	95.47	99.6	97.99	1.37	94.85	99.57
	IGP61	FG2n total /G2n	90.14	4.87	74.04	97.35	90.38	4.36	77.3	97.22	92.35	3.49	80.66	97.51	90.44	5.32	80.13	96.08
	IGP62	Fn	78.34	4.62	66.48	87.48	77.87	4.8	64.41	86.52	80.17	4.08	67.55	88.92	80.29	5.5	68	89.14
	IGP63	FG0n/G0n	76.86	5.21	59.24	86.18	75.92	5.97	56.59	86.54	77.79	5.12	60.71	88.33	78.88	6.12	64.21	88.46
	IGP64	FG1n/G1n	79.39	4.45	66.38	87.63	79.37	4.46	67.99	87.69	81.99	4.12	68.72	90.2	82.11	4.53	71.27	89.97
	IGP65	FG2n/G2n	79.7	5.67	62.35	90.2	79.03	5.66	60.13	89.57	80.99	5.3	63.28	90.49	80.01	6.58	65.26	89.87
	IGP66	FBn	17.01	3.39	10.87	25.9	17.51	3.65	10.49	26.43	16.06	3.41	9	26.36	15.47	3.82	9.14	24.47
	IGP67	FBG0n/G0n	19.97	4.55	12.25	33.2	20.91	4.76	11.66	36.83	19.07	4.05	10.51	32.08	18.25	4.49	10.07	30.24
	IGP68	FBG1n/G1n	18	3.8	11.1	28.42	18.04	4.06	10.73	28.46	16.35	4.06	8.85	26.28	15.87	4.17	9.44	25.7
	IGP69	FBG2n/G2n	10.42	2.305	6.36	17.47	11.26	3	5.78	20.77	11.36	3.025	5.72	20.94	10.37	3.058	5.6	17.76
	IGP70	FBn/Fn	0.2187	0.05	0.12	0.38	0.227	0.06	0.12	0.38	0.202	0.055	0.1	0.37	0.1943	0.06	0.1	0.36
	IGP71	FBn/Fn total	17.85	3.62	11.05	27.64	18.38	3.98	10.85	27.57	16.7	3.5	9.23	26.91	16.18	4.31	9.3	26.47
	IGP72	Fn/(Bn + FBn)	4.615	1.132	2.58	7.9	4.497	1.19	2.59	8	5.046	1.245	2.66	9.28	5.262	1.6	2.73	9.54
	IGP73	Bn/(Fn + FBn)	4.243	2.268	1.08	12.2	3.382	1.24	1.33	7.56	3.394	1.075	1.54	7.2	3.676	1.5	1.29	8.48
	IGP74	FBG2n/FG2n	0.1316	0.04	0.07	0.25	0.1434	0.04	0.07	0.27	0.1416	0.0475	0.06	0.28	0.1316	0.04	0.06	0.24
	IGP75	FBG2n /(FG2n + FBG2n )	11.59	2.83	6.73	19.93	12.5	3.3	6.15	23.82	12.34	3.52	5.95	22.92	11.58	3.715	5.89	22.38
	IGP76	FG2n/(BG2n + FBG2n)	6.585	1.965	1.96	12.72	6.391	1.995	2.12	13.26	6.541	2.175	2.64	13.62	6.861	2.73	3.1	13.66
	IGP77	BG2n/(FG2n + FBG2n)	23.96	13.01	6.07	71.59	18.96	7.4	6.46	43.4	18.34	7.64	8.86	44.14	21.83	9.58	9.94	53.86
