# Supplementary material for: Loci Associated with N-Glycosylation of Human Immunoglobulin G Show Pleiotropy with Autoimmune Diseases and Haematological Cancers
Source: PLoS Genet. 2013 Jan 31;9(1):e1003225. doi: 10.1371/journal.pgen.1003225 (PMC3561084; doi:10.1371/journal.pgen.1003225)
Supplement: Table S4 — Population-specific and pooled genomic control (GC) factors for associations with UPLC glycan traits. (XLS) [file pgen.1003225.s005.xls]

## Sheet: ST4 - GC lambdas
GROUP	Edinburgh_Code	Zagreb_Code	CROATIA-Vis	CROATIA-Korcula	ORCADES	NSPHS	POOLED
Total IgG glycans (neutral + charged)	IGP1	GP1	1.00892	1.0023	0.950853	0.905154	0.995623
	IGP2	GP2	1.00858	1.00129	1.01059	1.01359	0.997036
	IGP3	GP4	1.00147	0.984809	1.00127	1.02609	1.00553
	IGP4	GP5	0.96854	1.01303	1.01206	0.874405	0.964657
	IGP5	GP6	0.996844	1.00659	1.00772	1.01664	0.999077
	IGP6	GP7	1.00844	1.01394	1.01563	1.02609	0.998074
	IGP7	GP8	1.0067	1.01168	1.00532	1.01888	1.00212
	IGP8	GP9	1.00042	1.01209	1.00322	1.01889	0.999396
	IGP9	GP10	1.00095	1.00451	1.00216	1.01087	1.007
	IGP10	GP11	1.00431	1.00627	0.996278	1.02294	1.02118
	IGP11	GP12	1.00336	1.00927	0.998859	1.00432	1.00273
	IGP12	GP13	1.00154	1.00145	1.01515	1.00018	0.994345
	IGP13	GP14	0.997675	1.00211	1.0002	1.01563	1.01076
	IGP14	GP15	1.00053	1.00306	0.998478	1.00693	0.994642
	IGP15	GP16	1.01164	1.00071	1.00769	1.01353	1.00373
	IGP16	GP17	0.93945	1.00701	0.997318	1.00353	0.965144
	IGP17	GP18	1.00452	0.999942	1.01296	1.02184	1.01036
	IGP18	GP19	1.00714	0.999289	0.99514	1.0023	1.0046
	IGP19	GP20	0.999112	1.00698	0.991634	0.980312	0.999105
	IGP20	GP21	0.97301	1.01073	1.0001	0.940594	0.982995
	IGP21	GP22	1.01616	1.00005	1.00936	0.96244	0.999943
	IGP22	GP23	1.01832	1.01333	0.993564	1.00177	1.00575
	IGP23	GP24	1.00763	1.00388	0.995519	0.985992	1.00382
Total IgG glycans - derived parameters	IGP24	FGS/(FG+FGS)	1.00805	1.00269	0.995354	1.02979	1.0084
	IGP25	FBGS/(FBG+FBGS)	0.998057	1.00086	0.986857	1.00101	1.02264
	IGP26	FGS/(F+FG+FGS)	1.00886	0.998696	1.00535	1.02231	1.01013
	IGP27	FBGS/(FB+FBG+FBGS)	1.00817	1.00116	0.990541	1.00013	1.01011
	IGP28	FG1S1/(FG1+FG1S1)	1.00463	1.00551	1.00284	0.953562	1.00364
	IGP29	FG2S1/(FG2+FG2S1+FG2S2)	1.00735	1.00225	1.00617	1.00719	1.00114
	IGP30	FG2S2/(FG2+FG2S1+FG2S2)	1.00045	0.998736	0.989588	0.983123	1.01
	IGP31	FBG2S1/(FBG2+FBG2S1+FBG2S2)	1.00527	1.00163	0.998421	1.00718	0.996749
	IGP32	FBG2S2/(FBG2+FBG2S1+FBG2S2)	1.00315	1.01225	0.999734	0.941327	1.00536
	IGP33	FtotalS1/FtotalS2	1.00375	1.00625	0.995761	0.97655	1.02271
	IGP34	FS1/FS2	1.00401	1.00351	0.995423	0.997872	1.01719
	IGP35	FBS1/FBS2	1.0074	0.992904	1.0064	0.956028	0.987678
	IGP36	FBStotal/FStotal	1.00243	0.995462	1.00576	1.01405	1.016
	IGP37	FBS1/FS1	1.00062	0.996948	0.995821	1.01715	1.01201
	IGP38	FBS1/(FS1+FBS1)	1.00259	0.995833	0.997534	1.01214	1.01201
	IGP39	FBS2/FS2	1.00949	1.00136	1.00682	1.03236	0.998606
	IGP40	FBS2/(FS2+FBS2)	1.00512	1.00364	1.00496	1.01959	0.999821
Neutral IgG glycans	IGP41	GP1n	1.00661	1.00438	0.958984	0.907793	0.996457
	IGP42	GP2n	1.00766	1.0025	1.0085	1.00713	0.997861
	IGP43	GP4n	1.00067	0.984185	0.999702	1.02382	0.999493
	IGP44	GP5n	1.00791	1.0148	1.011	0.872683	0.981189
	IGP45	GP6n	0.994167	0.999011	1.00981	1.01282	1.00202
	IGP46	GP7n	1.00924	1.01099	1.01178	1.01713	0.995382
	IGP47	GP8n	1.01083	1.00903	1.00209	1.02042	1.00019
	IGP48	GP9n	0.990502	1.0094	1.00264	1.01644	0.996726
	IGP49	GP10n	0.992353	1.00518	0.999706	1.00971	1.00405
	IGP50	GP11n	1.00346	1.00811	0.998978	1.02602	1.00361
	IGP51	GP12n	1.00869	1.00555	1.00054	1.01421	1.00702
	IGP52	GP13n	0.992788	1.00294	1.01097	1.00042	0.989633
	IGP53	GP14n	0.999227	0.994967	1.00245	1.01763	1.0121
	IGP54	GP15n	1.00477	1.00447	1.00225	1.01573	0.987206
Neutral IgG glycans - derived parameters	IGP55	G0n	0.995754	0.989961	0.992805	1.02292	1.00558
	IGP56	G1n	1.00606	1.0063	1.00097	1.01029	1.01239
	IGP57	G2n	0.99781	0.994	1.00449	1.01501	1.00794
	IGP58	Fn total	1.005	1.00927	1.00792	1.00952	1.00163
	IGP59	FG0n total/G0n	1.00253	1.00049	1.01348	1.01082	1.00453
	IGP60	FG1n total/G1n	1.01013	1.01141	1.00979	1.0006	0.996245
	IGP61	FG2n total /G2n	1.00301	1.00605	1.00699	1.00993	0.997995
	IGP62	Fn	1.00312	1.00436	0.997469	1.00622	1.00509
	IGP63	FG0n/G0n	1.00326	1.00154	1.00105	0.992739	1.00399
	IGP64	FG1n/G1n	1.00876	1.00734	0.990045	1.02343	0.99679
	IGP65	FG2n/G2n	1.00307	1.00646	1.00056	1.01569	0.995909
	IGP66	FBn	1.00003	1.00693	0.996662	1.02011	1.00273
	IGP67	FBG0n/G0n	0.998324	0.997739	1.00307	1.01615	0.999421
	IGP68	FBG1n/G1n	1.00402	1.01008	1.00137	1.02491	1.00198
	IGP69	FBG2n/G2n	1.00574	1.01308	0.994297	1.02319	1.00619
	IGP70	FBn/Fn	0.999073	1.00686	0.995123	1.01369	1.00574
	IGP71	FBn/Fn total	0.999978	1.0077	0.994859	1.01251	1.00177
	IGP72	Fn/(Bn + FBn)	0.998831	1.00692	0.99188	1.0118	1.00303
	IGP73	Bn/(Fn + FBn)	0.992486	1.00188	1.01023	1.00062	0.99072
	IGP74	FBG2n/FG2n	1.01021	1.00838	0.99274	1.02861	0.999058
	IGP75	FBG2n /(FG2n + FBG2n )	1.0079	1.00707	0.997118	1.02368	1.00368
	IGP76	FG2n/(BG2n + FBG2n)	1.00637	1.0094	0.994242	1.01962	1.00738
	IGP77	BG2n/(FG2n + FBG2n)	1.00877	1.00081	1.01835	0.9791	0.986569
